# Supplementary material
Source: MDPI journal article supplement (https://www.mdpi.com/2227-9717/11/12/3292)
Supplement: s1 [file s1]

## Supplementary Materials

Table of Abbreviations

| Abbreviation | Scientific name                   | Common name |
|--------------|-----------------------------------|-------------|
| AAP          | <i>Astrocaryum aculeatum</i> pulp | Kuru        |
| AVP          | <i>Astrocaryum vulgare</i> pulp   | Awata       |
| EOP          | <i>Euterpe oleracea</i> pulp      | Acai        |
| OBP          | <i>Oenocarpus bacaba</i> pulp     | Turru       |
| MFP          | <i>Mauritia flexuosa</i> pulp     | Ite         |
| AAS          | <i>Astrocaryum aculeatum</i> seed | Kuru        |
| CGS          | <i>Carapa guianensis</i> seed     | Crabwood    |

## Standardized logistic function (SLF)

(a) Sun-dried pulp

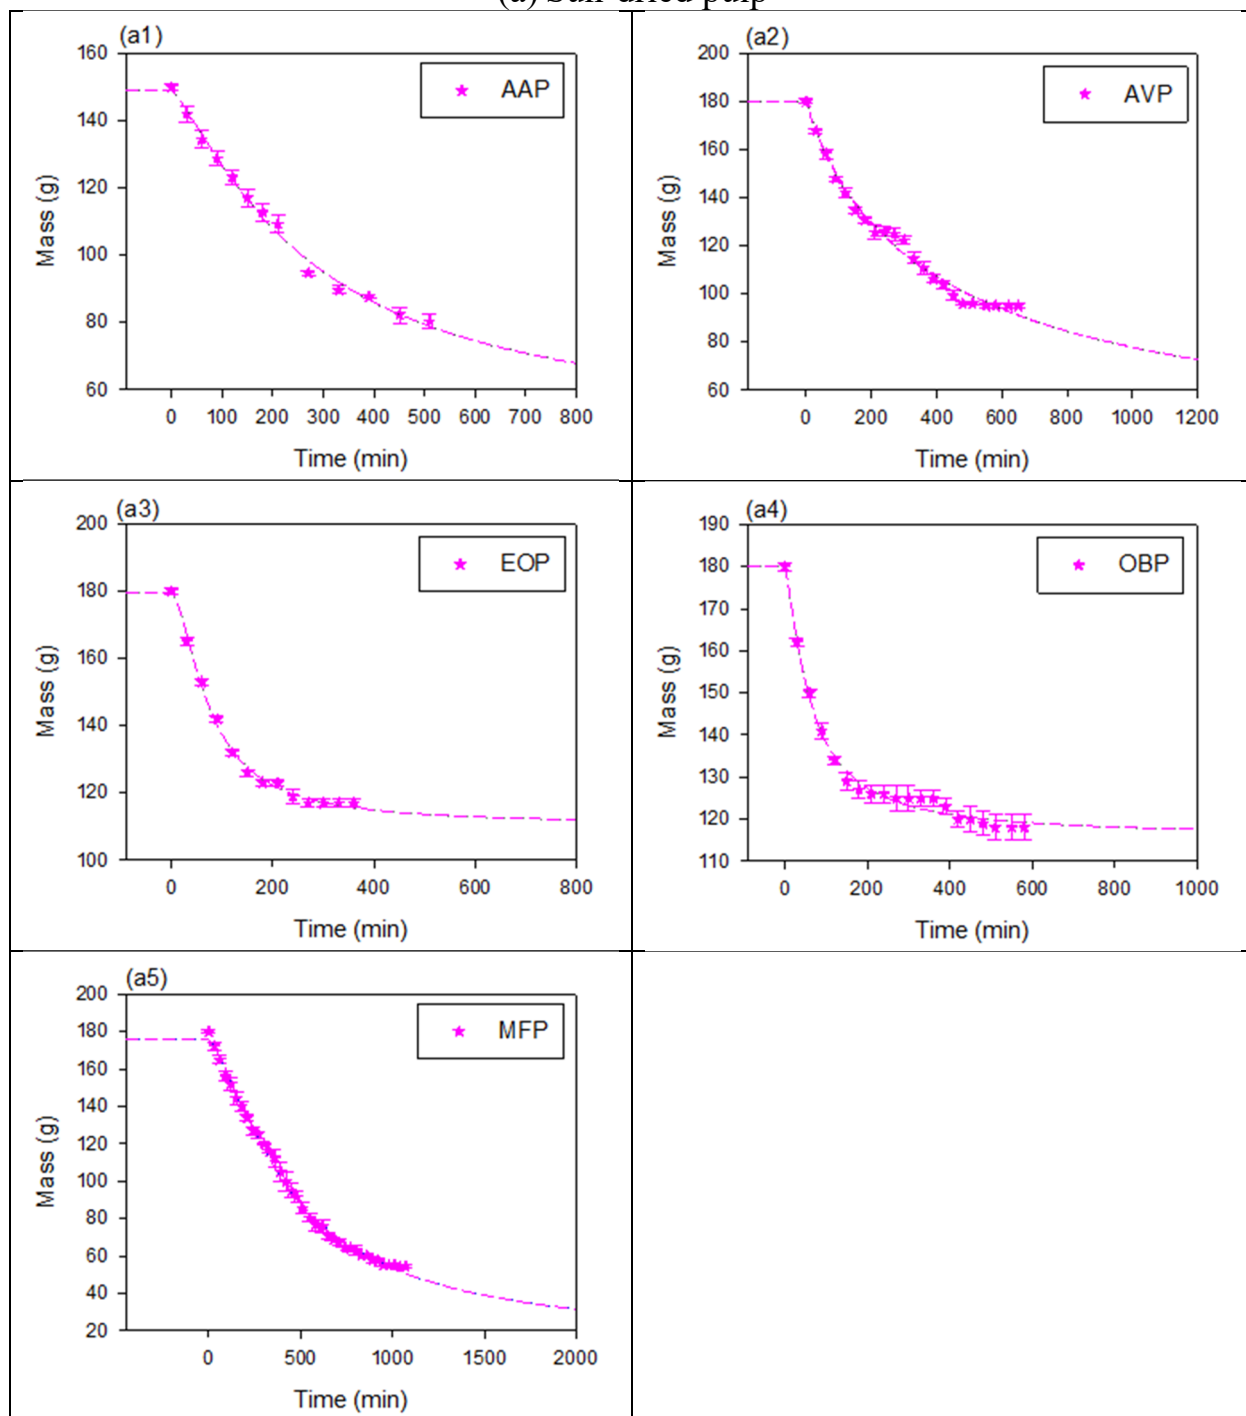

**Figure S1. (a):** Standardized logistic function (SLF) curve fittings of sun-dried AAP, AVP, EOP, OBP and MFP

(b) Shade-dried pulp

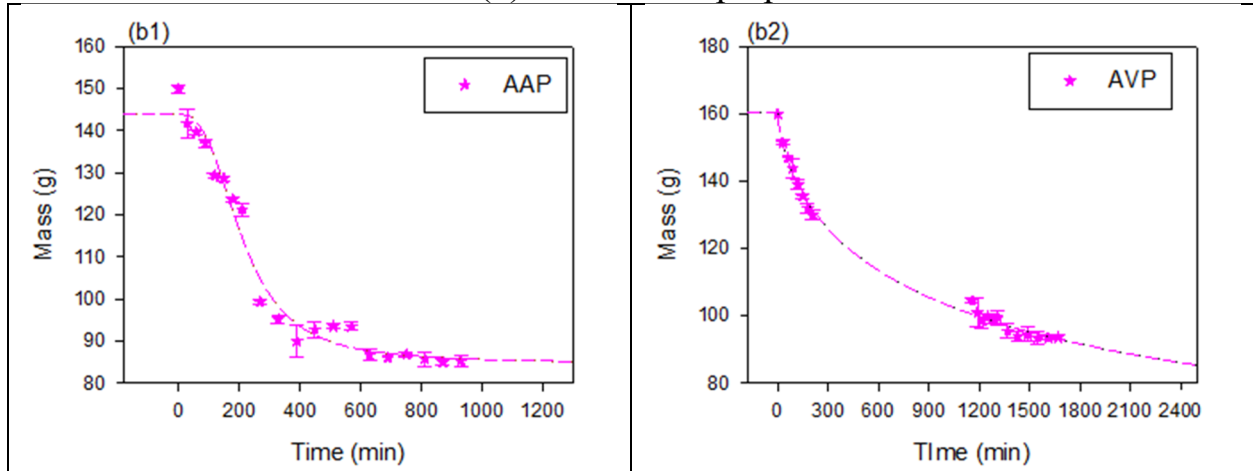

**Figure S1. (b):** Standardized logistic function (SLF) curve fittings of shade-dried AAP and AVP,

(c) Sun-dried seeds

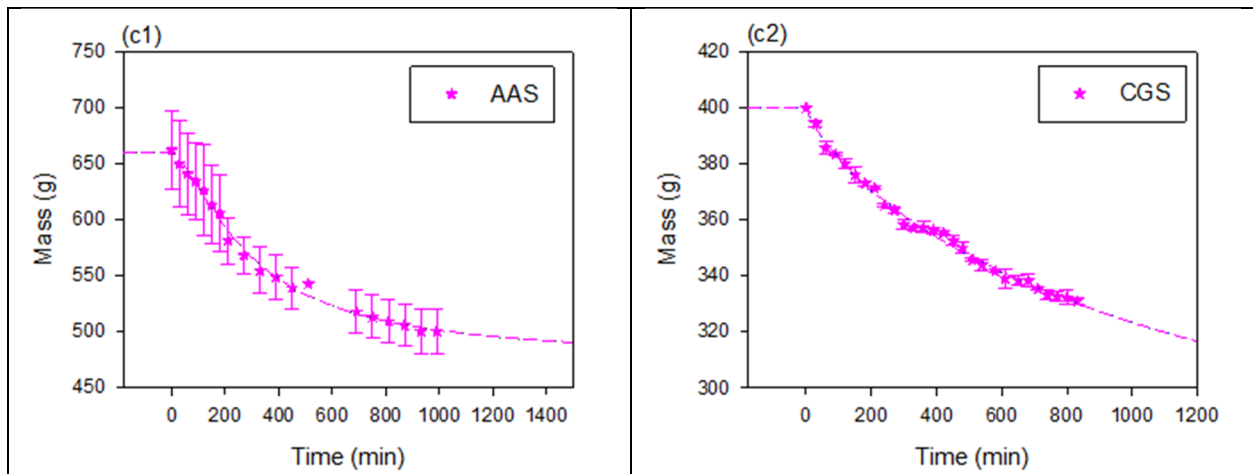

**Figure S1. (c):** Standardized logistic function (SLF) curve fittings for the sun-dried seeds of AAs and CGS

## Modified Page (MP) model

### (a) Sun-dried pulp

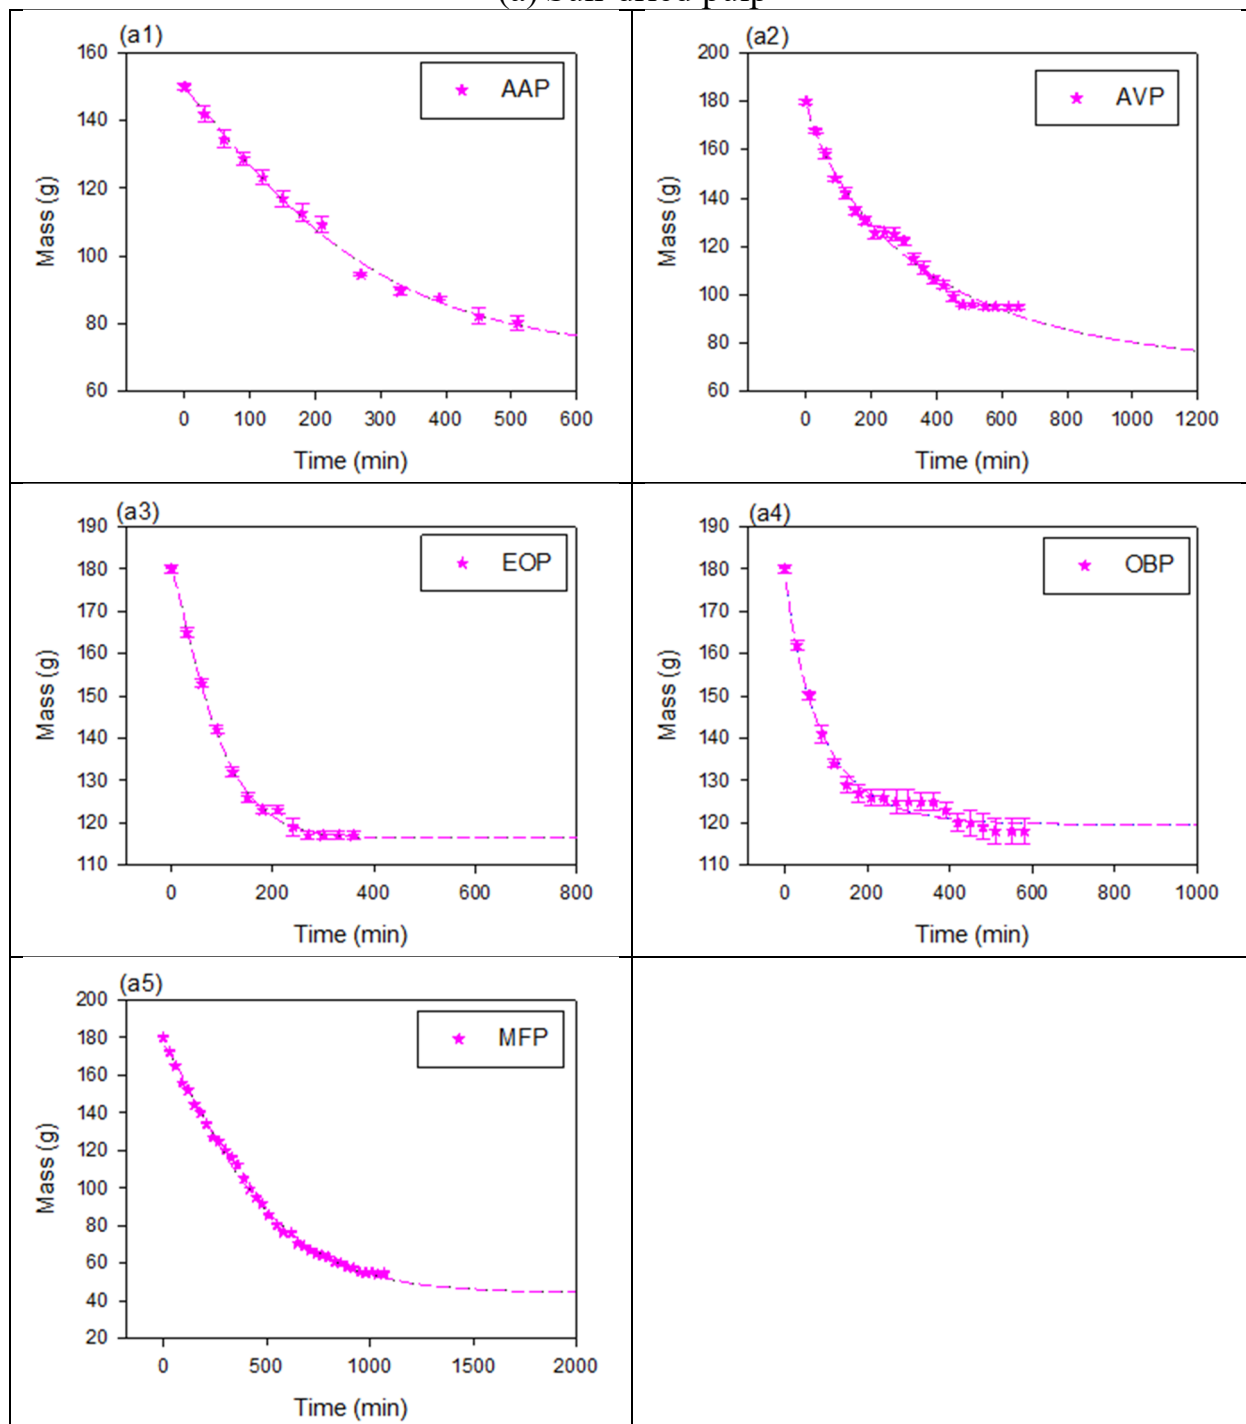

**Figure S2. (a):** Modified Page curve fittings of sun-dried AAP, AVP, EOP, OBP and MFP

(b) Shade dried pulp

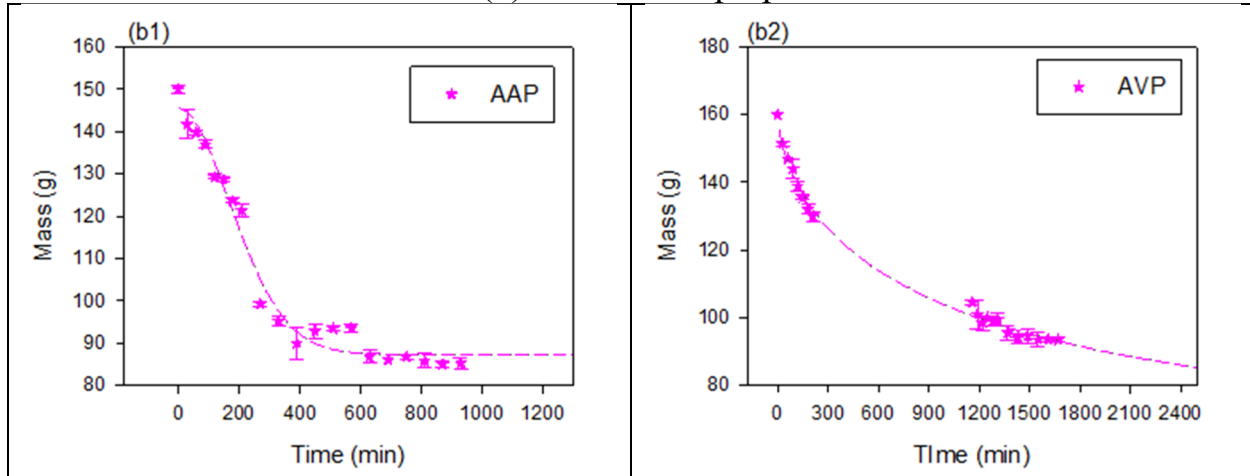

**Figure S2. (b):** Modified Page (MP) curve fittings of shade dried AAP and AVP

(c) Sun-dried seeds

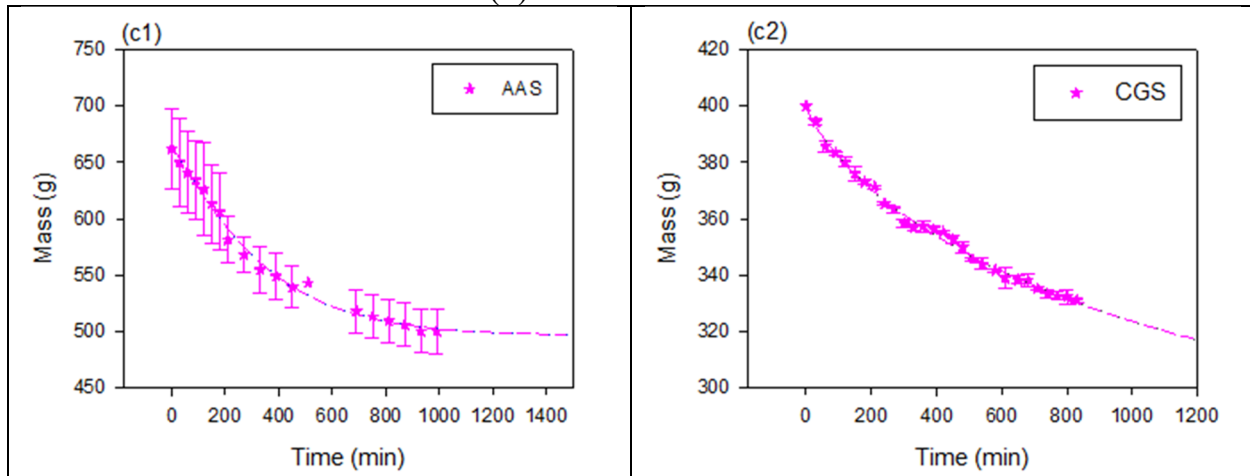

**Figure S2. (c):** Modified Page (MP) curve fittings of sun dried AAS and CGS

## Lewis Model

(a) Sun-dried pulp

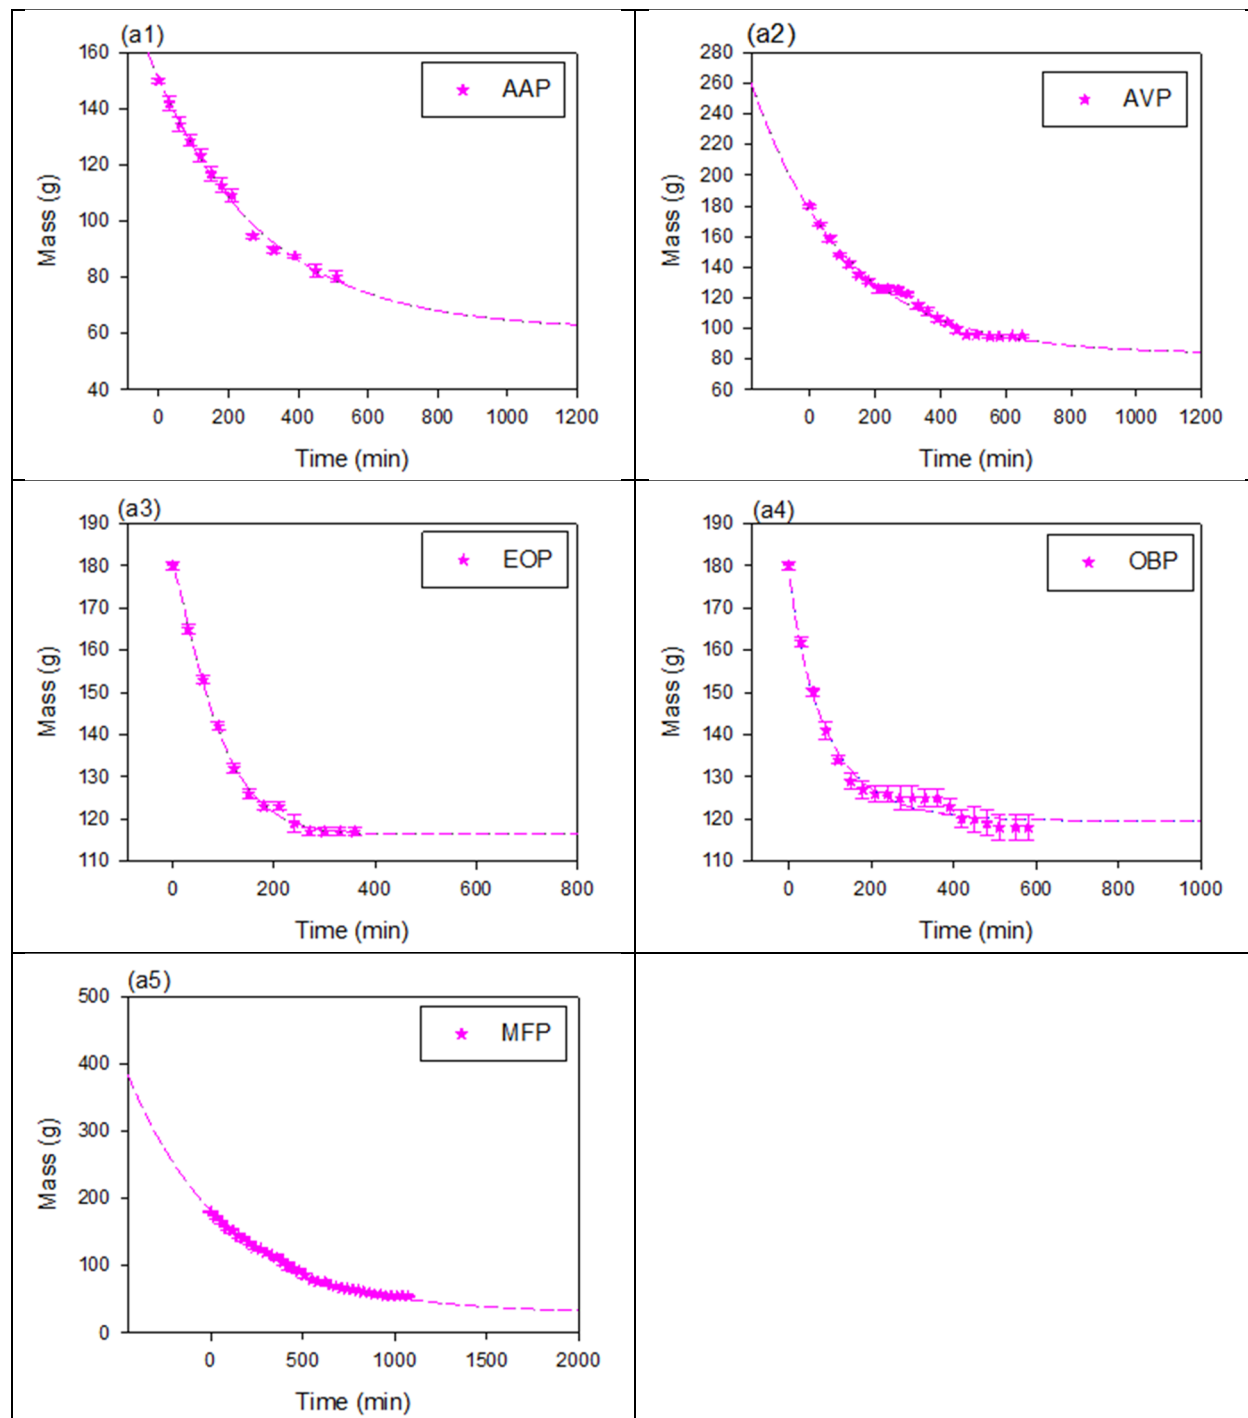

**Figure S3. (a):** Lewis model curve fittings of sun-dried AAP, AVP, EOP, OBP and MFP

(b) Shade-dried pulp

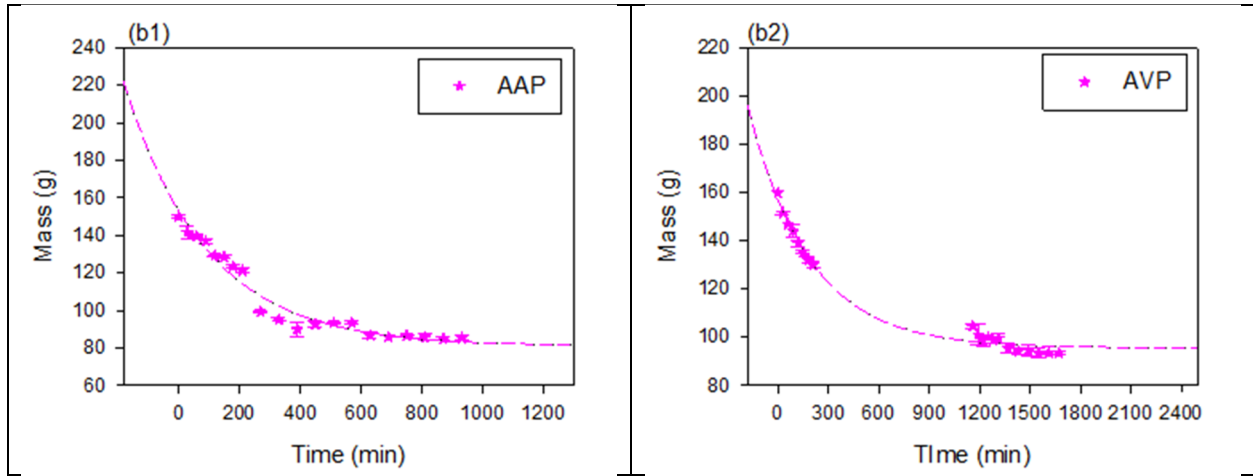

**Figure S3. (b):** Standardized logistic function (SLF) curve fittings for the sun-dried seeds of AAs and CGS

(C) Sun-dried seeds

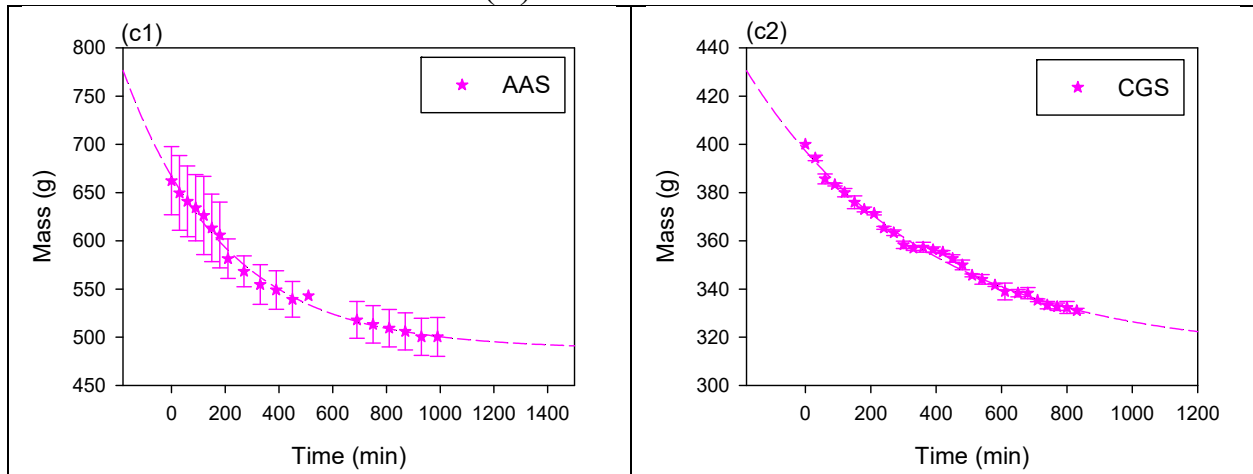

**Figure S3. (c):** Lewis model curve fittings of sun dried AAS and CGS

## Raw Data-Sun dried pulp

**Table S1:AAP.**

| Time 1<br>(min) | Tray<br>1 (g) | Time 2<br>(min) | Tray<br>2 (g) | Time 3<br>(min) | Tray<br>3 (g) | Time 4<br>(min) | Tray<br>4 (g) | Mean<br>Mass (g) | Std<br>dev |
|-----------------|---------------|-----------------|---------------|-----------------|---------------|-----------------|---------------|------------------|------------|
| 0               | 150           | 0               | 150           | 0               | 150           | 0               | 150           | 150.0            | 1.0        |
| 30              | 139           | 30              | 141           | 30              | 144           | 30              | 144           | 142.0            | 2.4        |
| 60              | 131           | 60              | 134           | 60              | 137           | 60              | 136           | 134.5            | 2.6        |
| 90              | 127           | 90              | 127           | 90              | 131           | 90              | 130           | 128.8            | 2.1        |
| 120             | 120           | 120             | 124           | 120             | 124           | 120             | 125           | 123.3            | 2.2        |
| 150             | 114           | 150             | 116           | 150             | 119           | 150             | 119           | 117.0            | 2.4        |
| 180             | 109           | 180             | 113           | 180             | 115           | 180             | 114           | 112.8            | 2.6        |
| 210             | 107           | 210             | 110           | 210             | 113           | 210             | 111           | 109.3            | 2.5        |
| 270             | 102           | 270             | 94            | 270             | 95            | 270             | 95            | 94.7             | 0.6        |
| 330             | 81            | 330             | 89            | 330             | 89            | 330             | 91            | 89.7             | 1.2        |
| 390             | 81            | 390             | 87            | 390             | 88            | 390             | 88            | 87.7             | 0.6        |
| 450             | 79            | 450             | 82            | 450             | 84            | 450             | 84            | 82.3             | 2.4        |
| 510             | 71            | 510             | 78            | 510             | 81            | 510             | 82            | 80.3             | 2.1        |

**Table S2:AVP.**

| Time 1<br>(min) | Tray 1<br>(g) | Time 2<br>(min) | Tray 2<br>(g) | Time 3<br>(min) | Tray 3<br>(g) | Mean Mass<br>(g) | Std.dev |
|-----------------|---------------|-----------------|---------------|-----------------|---------------|------------------|---------|
| 30              | 167           | 30              | 168           | 30              | 168           | 168.0            | 1.0     |
| 60              | 158           | 60              | 160           | 60              | 157           | 158.0            | 2.0     |
| 90              | 148           | 90              | 148           | 90              | 149           | 148.0            | 1.0     |
| 120             | 140           | 120             | 143           | 120             | 143           | 142.0            | 2.0     |
| 150             | 133           | 150             | 136           | 150             | 135           | 135.0            | 1.5     |
| 180             | 129           | 180             | 131           | 180             | 132           | 131.0            | 1.5     |
| 210             | 124           | 210             | 124           | 210             | 129           | 126.0            | 2.9     |
| 240             | 124           | 240             | 126           | 240             | 128           | 126.0            | 2.0     |
| 270             | 122           | 270             | 126           | 270             | 127           | 125.0            | 2.6     |
| 300             | 121           | 300             | 121           | 300             | 125           | 122.0            | 1.6     |
| 330             | 113           | 330             | 114           | 330             | 118           | 115.0            | 2.3     |
| 360             | 110           | 360             | 110           | 360             | 113           | 111.0            | 2.6     |
| 390             | 106           | 390             | 105           | 390             | 108           | 106.0            | 1.7     |
| 420             | 102           | 420             | 104           | 420             | 106           | 104.0            | 1.5     |
| 450             | 99            | 450             | 99            | 450             | 100           | 99.0             | 2.0     |
| 480             | 96            | 480             | 96            | 480             | 97            | 96.0             | 0.6     |
| 510             | 96            | 510             | 96            | 510             | 96            | 96.0             | 0.6     |
| 550             | 95            | 550             | 94            | 550             | 95            | 95.0             | 1.0     |
| 580             | 95            | 580             | 93            | 580             | 95            | 95.0             | 1.0     |
| 620             | 95            | 620             | 94            | 620             | 95            | 95.0             | 1.0     |
| 650             | 94            | 650             | 95            | 650             | 95            | 95.0             | 1.0     |



**Table S3:EOP.**

| Time 1<br>(min) | Tray 1<br>(g) | Time 2<br>(min) | Tray 2<br>(g) | Time 3<br>(min) | Tray 3<br>(g) | Mean Mass<br>(g) | Std.dev |
|-----------------|---------------|-----------------|---------------|-----------------|---------------|------------------|---------|
| 30              | 165           | 30              | 166           | 30              | 165           | 180              | 0.6     |
| 60              | 154           | 60              | 154           | 60              | 153           | 165              | 0.6     |
| 90              | 142           | 90              | 142           | 90              | 142           | 153              | 0.0     |
| 120             | 132           | 120             | 133           | 120             | 133           | 142              | 0.6     |
| 150             | 126           | 150             | 126           | 150             | 127           | 132              | 0.6     |
| 180             | 122           | 180             | 123           | 180             | 124           | 126              | 1.0     |
| 210             | 122           | 210             | 123           | 210             | 124           | 123              | 1.0     |
| 240             | 118           | 240             | 118           | 240             | 121           | 123              | 1.7     |
| 270             | 117           | 270             | 117           | 270             | 118           | 119              | 0.6     |
| 300             | 117           | 300             | 117           | 300             | 118           | 117              | 0.6     |
| 330             | 117           | 330             | 117           | 330             | 118           | 117              | 0.6     |
| 360             | 117           | 360             | 117           | 360             | 118           | 117              | 0.6     |
| 360             | 117           | 360             | 117           | 360             | 118           | 117              | 0.6     |

**Table S4:MFP.**

| Time 1<br>(min) | Tray 1<br>(g) | Time 2<br>(min) | Tray 2<br>(g) | Time 3<br>(min) | Tray 3<br>(g) | Mean Mass<br>(g) | Std.dev |
|-----------------|---------------|-----------------|---------------|-----------------|---------------|------------------|---------|
| 0               | 180           | 0               | 180           | 0               | 180           | 180.0            | 1.0     |
| 30              | 170           | 30              | 173           | 30              | 174           | 172.3            | 2.1     |
| 60              | 162           | 60              | 166           | 60              | 165           | 165.0            | 2.1     |
| 90              | 153           | 90              | 158           | 90              | 157           | 156.0            | 2.6     |
| 120             | 148           | 120             | 154           | 120             | 154           | 152.0            | 3.5     |
| 150             | 141           | 150             | 147           | 150             | 145           | 144.3            | 3.1     |
| 180             | 137           | 180             | 142           | 180             | 141           | 140.0            | 2.6     |
| 210             | 133           | 210             | 136           | 210             | 133           | 134.0            | 1.7     |
| 240             | 130           | 240             | 134           | 240             | 134           | 127.0            | 2.3     |
| 270             | 131           | 270             | 134           | 270             | 131           | 125.0            | 1.7     |
| 300             | 130           | 300             | 131           | 300             | 130           | 120.0            | 0.6     |
| 330             | 110           | 330             | 122           | 330             | 122           | 116.0            | 1.0     |
| 360             | 107           | 360             | 115           | 360             | 115           | 112.0            | 4.6     |
| 390             | 99            | 390             | 108           | 390             | 108           | 105.0            | 5.2     |
| 420             | 94            | 420             | 102           | 420             | 103           | 100.0            | 4.9     |
| 450             | 99            | 450             | 103           | 450             | 95            | 95.0             | 4.0     |
| 480             | 88            | 480             | 93            | 480             | 94            | 92.0             | 3.2     |
| 510             | 82            | 510             | 87            | 510             | 88            | 86.0             | 3.2     |
| 550             | 78            | 550             | 81            | 550             | 82            | 80.0             | 2.1     |
| 580             | 74            | 580             | 76            | 580             | 80            | 77.0             | 3.1     |
| 620             | 73            | 620             | 75            | 620             | 80            | 76.0             | 3.6     |
| 650             | 69            | 650             | 71            | 650             | 72            | 71.0             | 1.5     |
| 680             | 68            | 680             | 69            | 680             | 70            | 69.0             | 1.0     |

| Time 1<br>(min) | Tray 1<br>(g) | Time 2<br>(min) | Tray 2<br>(g) | Time 3<br>(min) | Tray 3<br>(g) | Mean Mass<br>(g) | Std.dev |
|-----------------|---------------|-----------------|---------------|-----------------|---------------|------------------|---------|
| 710             | 66            | 710             | 66            | 710             | 69            | 67.0             | 1.7     |
| 740             | 67            | 740             | 66            | 740             | 67            | 65.0             | 0.6     |
| 770             | 66            | 770             | 66            | 770             | 69            | 64.0             | 1.7     |
| 800             | 62            | 800             | 61            | 800             | 66            | 63.0             | 2.6     |
| 830             | 61            | 830             | 60            | 830             | 61            | 61.0             | 0.6     |
| 860             | 60            | 860             | 59            | 860             | 61            | 60.0             | 1.0     |
| 890             | 58            | 890             | 56            | 890             | 60            | 58.0             | 2.0     |
| 920             | 58            | 920             | 56            | 920             | 58            | 57.0             | 1.2     |
| 950             | 55            | 950             | 55            | 950             | 56            | 55.0             | 1.0     |
| 980             | 55            | 980             | 54            | 980             | 56            | 55.0             | 1.0     |
| 1010            | 55            | 1010            | 55            | 1010            | 56            | 55.0             | 1.0     |
| 1040            | 55            | 1040            | 53            | 1040            | 55            | 54.0             | 1.0     |
| 1070            | 54            | 1070            | 54            | 1070            | 56            | 55.0             | 1.0     |

**Table S5:OBP.**

| Time 1<br>(min) | Tray 1<br>(g) | Time 2<br>(min) | Tray 2<br>(g) | Time 3<br>(min) | Tray 3<br>(g) | Mean Mass<br>(g) | Std.de<br>v |
|-----------------|---------------|-----------------|---------------|-----------------|---------------|------------------|-------------|
| 0               | 180           | 0               | 180           | 0               | 180           | 180              | 1           |
| 30              | 162           | 30              | 162           | 30              | 162           | 162              | 1           |
| 60              | 151           | 60              | 149           | 60              | 151           | 150              | 1           |
| 90              | 140           | 90              | 139           | 90              | 143           | 141              | 2           |
| 120             | 134           | 120             | 133           | 120             | 135           | 134              | 1           |
| 150             | 128           | 150             | 127           | 150             | 131           | 129              | 2           |
| 180             | 126           | 180             | 125           | 180             | 127           | 127              | 2           |
| 210             | 124           | 210             | 125           | 210             | 128           | 126              | 2           |
| 240             | 123           | 240             | 125           | 240             | 128           | 126              | 2           |
| 270             | 123           | 270             | 125           | 270             | 127           | 125              | 3           |
| 300             | 123           | 300             | 125           | 300             | 127           | 125              | 3           |
| 330             | 122           | 330             | 121           | 330             | 122           | 125              | 2           |
| 360             | 119           | 360             | 117           | 360             | 122           | 125              | 2           |
| 390             | 117           | 390             | 116           | 390             | 121           | 123              | 2           |
| 420             | 117           | 420             | 116           | 420             | 121           | 120              | 2           |
| 450             | 117           | 450             | 116           | 450             | 121           | 120              | 3           |
| 480             | 117           | 480             | 116           | 480             | 121           | 119              | 3           |
| 510             | 117           | 510             | 116           | 510             | 121           | 118              | 3           |
| 550             | 117           | 550             | 116           | 550             | 121           | 118              | 3           |
| 580             | 117           | 580             | 116           | 580             | 121           | 118              | 3           |

## Raw Data-Shade-dried pulp

**Table S6:**AAP.

| Time 1 (min) | Tray 1 (g) | Time 2 (min) | Tray 2 (g) | Time 3 (min) | Tray 3 (g) | Mean Mass (g) | Std.dev |
|--------------|------------|--------------|------------|--------------|------------|---------------|---------|
| 0            | 150        | 0            | 150        | 0            | 150        | 150.0         | 1.0     |
| 30           | 137        | 30           | 144        | 30           | 142        | 142.0         | 3.0     |
| 60           | 132        | 60           | 140        | 60           | 140        | 140.0         | 1.0     |
| 90           | 129        | 90           | 137        | 90           | 136        | 137.0         | 1.0     |
| 120          | 122        | 120          | 129        | 120          | 129        | 129.0         | 1.0     |
| 150          | 124        | 150          | 129        | 150          | 129        | 129.0         | 1.0     |
| 180          | 117        | 180          | 124        | 180          | 124        | 124.0         | 1.0     |
| 210          | 115        | 210          | 120        | 210          | 121        | 121.0         | 2.0     |
| 270          | 99         | 270          | 100        | 270          | 99         | 99.0          | 1.0     |
| 330          | 96         | 330          | 94         | 330          | 95         | 95.0          | 1.0     |
| 390          | 89         | 390          | 85         | 390          | 93         | 90.0          | 4.0     |
| 450          | 94         | 450          | 93         | 450          | 94         | 93.0          | 2.0     |
| 510          | 94         | 510          | 93         | 510          | 94         | 94.0          | 1.0     |
| 570          | 93         | 570          | 93         | 570          | 95         | 94.0          | 1.0     |
| 630          | 89         | 630          | 86         | 630          | 86         | 87.0          | 2.0     |
| 690          | 86         | 690          | 86         | 690          | 86         | 86.0          | 0.0     |
| 750          | 87         | 750          | 87         | 750          | 87         | 87.0          | 1.0     |
| 810          | 88         | 810          | 85         | 810          | 86         | 86.0          | 2.0     |
| 870          | 86         | 870          | 85         | 870          | 85         | 85.0          | 1.0     |
| 930          | 87         | 930          | 85         | 930          | 85         | 85.0          | 1.0     |

**Table S7:** AVP.

| Time 1 (min) | Tray 1 (g) | Time 2 (min) | Tray 2 (g) | Mean Mass (g) | Std.dev |
|--------------|------------|--------------|------------|---------------|---------|
| 0            | 160        | 0            | 160        | 160.0         | 0.0     |
| 30           | 151        | 30           | 152        | 151.5         | 0.7     |
| 60           | 147        | 60           | 147        | 147.0         | 0.0     |
| 90           | 142        | 90           | 146        | 144.0         | 2.8     |
| 120          | 140        | 120          | 138        | 139.0         | 1.4     |
| 150          | 136        | 150          | 135        | 135.5         | 0.7     |
| 180          | 131        | 180          | 133        | 132.0         | 1.4     |
| 210          | 129        | 210          | 131        | 130.0         | 1.4     |
| 1160         | 105        | 1160         | 104        | 104.5         | 0.7     |
| 1190         | 98         | 1190         | 104        | 101.0         | 4.2     |
| 1220         | 97         | 1220         | 100        | 98.5          | 2.1     |
| 1250         | 100        | 1250         | 100        | 100.0         | 0.0     |
| 1280         | 98         | 1280         | 100        | 99.0          | 1.4     |
| 1310         | 98         | 1310         | 101        | 99.5          | 2.1     |
| 1370         | 94         | 1370         | 97         | 95.5          | 2.1     |

| Time 1 (min) | Tray 1 (g) | Time 2 (min) | Tray 2 (g) | Mean Mass (g) | Std.dev |
|--------------|------------|--------------|------------|---------------|---------|
| 1430         | 93         | 1430         | 95         | 94.0          | 1.4     |
| 1490         | 93         | 1490         | 96         | 94.5          | 2.1     |
| 1550         | 92         | 1550         | 95         | 93.5          | 2.1     |
| 1610         | 93         | 1610         | 94         | 93.5          | 0.7     |
| 1670         | 93         | 1670         | 94         | 93.5          | 0.7     |

## Raw Data-Sun-dried seeds

**Table S8: AAS.**

| Time 1 (min) | Tray 1 (g) | Time 2 (min) | Tray 2 (g) | Time 3 (min) | Tray 3 (g) | Mean Mass (g) | Std.dev |
|--------------|------------|--------------|------------|--------------|------------|---------------|---------|
| 0            | 651        | 0            | 634        | 0            | 702        | 662.3         | 35.4    |
| 30           | 641        | 30           | 616        | 30           | 692        | 649.7         | 38.7    |
| 60           | 633        | 60           | 609        | 60           | 681        | 641.0         | 36.7    |
| 90           | 629        | 90           | 603        | 90           | 671        | 634.3         | 34.3    |
| 120          | 616        | 120          | 592        | 120          | 671        | 626.3         | 40.5    |
| 150          | 607        | 150          | 582        | 150          | 651        | 613.3         | 34.9    |
| 180          | 602        | 180          | 574        | 180          | 642        | 606.0         | 34.2    |
| 210          | 596        | 210          | 567        | 210          | -          | 581.5         | 20.5    |
| 270          | 580        | 270          | 550        | 270          | 575        | 568.3         | 16.1    |
| 330          | 564        | 330          | 531        | 330          | 569        | 554.7         | 20.6    |
| 390          | 559        | 390          | 526        | 390          | 562        | 549.0         | 20.0    |
| 450          | 549        | 450          | 518        | 450          | 551        | 539.3         | 18.5    |
| 510          | -          | 510          | -          | 510          | 543        | 543.0         | -       |
| 690          | 527        | 690          | 496        | 690          | 531        | 518.0         | 19.2    |
| 750          | 523        | 750          | 491        | 750          | 526        | 513.3         | 19.4    |
| 810          | 519        | 810          | 487        | 810          | 522        | 509.3         | 19.4    |
| 870          | 514        | 870          | 484        | 870          | 520        | 506.0         | 19.3    |
| 930          | 511        | 930          | 478        | 930          | 512        | 500.3         | 19.3    |
| 990          | 511        | 990          | 477        | 990          | 513        | 500.3         | 20.2    |

**Table S9: CGS.**

| Time 1 (min) | Tray 1 (g) | Time 2 (min) | Tray 2 (g) | Time 3 (min) | Tray 3 (g) | Mean Mass (g) | Std.dev |
|--------------|------------|--------------|------------|--------------|------------|---------------|---------|
| 0            | 400        | 0            | 400        | 0            | 400        | 400           | 0.0     |
| 30           | 395        | 30           | 393        | 30           | 395        | 394           | 1.0     |
| 60           | 388        | 60           | 385        | 60           | 384        | 386           | 2.0     |
| 90           | 383        | 90           | 384        | 90           | 383        | 383           | 1.0     |
| 120          | 381        | 120          | 378        | 120          | 381        | 380           | 2.0     |
| 150          | 377        | 150          | 378        | 150          | 373        | 376           | 3.0     |
| 180          | 374        | 180          | 373        | 180          | 372        | 373           | 1.0     |
| 210          | 371        | 210          | 371        | 210          | 372        | 371           | 1.0     |

|     |     |     |     |     |     |     |     |
|-----|-----|-----|-----|-----|-----|-----|-----|
| 240 | 365 | 240 | 366 | 240 | 365 | 365 | 1.0 |
| 270 | 364 | 270 | 364 | 270 | 362 | 363 | 1.0 |
| 300 | 357 | 300 | 360 | 300 | 358 | 358 | 2.0 |
| 330 | 355 | 330 | 356 | 330 | 358 | 357 | 1.0 |
| 360 | 355 | 360 | 358 | 360 | 359 | 357 | 2.0 |
| 390 | 355 | 390 | 357 | 390 | 357 | 356 | 1.0 |
| 420 | 355 | 420 | 355 | 420 | 356 | 355 | 1.0 |
| 450 | 354 | 450 | 351 | 450 | 353 | 353 | 2.0 |
| 480 | 350 | 480 | 348 | 480 | 352 | 350 | 2.0 |
| 510 | 345 | 510 | 346 | 510 | 346 | 346 | 1.0 |
| 540 | 342 | 540 | 344 | 540 | 346 | 344 | 2.0 |
| 580 | 341 | 580 | 342 | 580 | 342 | 342 | 1.0 |
| 610 | 337 | 610 | 337 | 610 | 343 | 339 | 3.0 |
| 650 | 337 | 650 | 338 | 650 | 340 | 338 | 2.0 |
| 680 | 337 | 680 | 337 | 680 | 341 | 338 | 2.0 |
| 710 | 335 | 710 | 336 | 710 | 335 | 335 | 1.0 |
| 740 | 335 | 740 | 332 | 740 | 333 | 333 | 2.0 |
| 770 | 333 | 770 | 334 | 770 | 331 | 333 | 2.0 |
| 800 | 330 | 800 | 332 | 800 | 335 | 332 | 3.0 |
| 830 | 330 | 830 | 331 | 830 | 332 | 331 | 1.0 |
